# Supplementary material for: RNA-Seq of the Caribbean reef-building coral Orbicella faveolata (Scleractinia-Merulinidae) under bleaching and disease stress expands models of coral innate immunity
Source: PeerJ journal article supplement (doi:10.7717/peerj.1616), 2016-02-15

### Pooled Raw Reads

%GC Content  
Across Reads

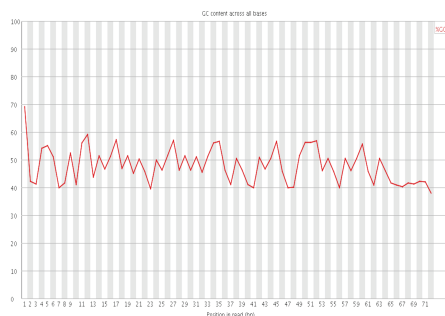

Quality Scores  
Per Base

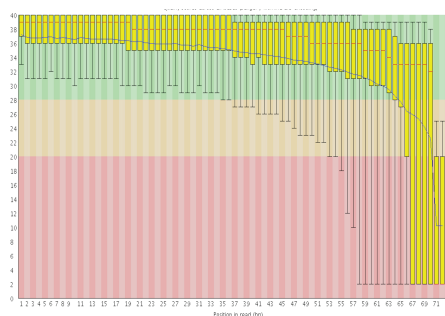

%GC  
Per Read  
Frequency  
Distrubution

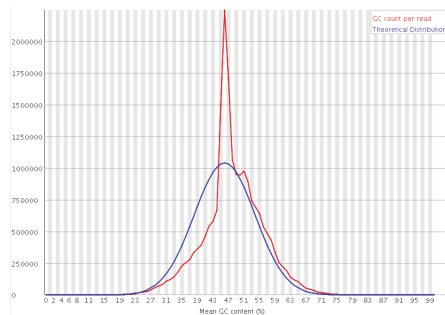

### Processed Reads for Assembly

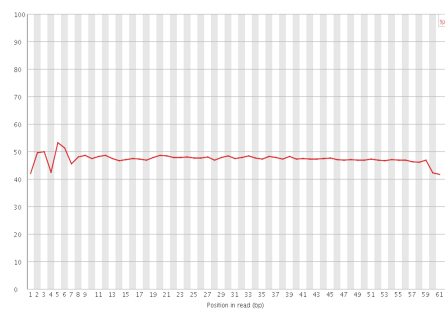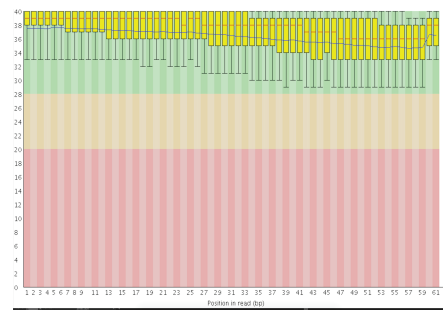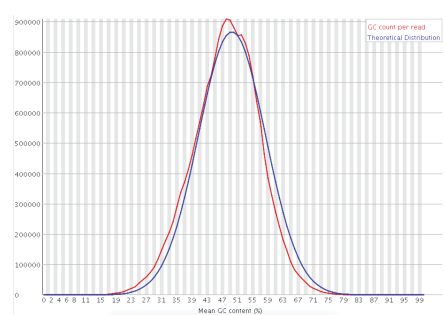

Supplement: SI_2_RNA-SeQC.pdf [file SI_2_RNA-SeQC.pdf]
