# Supplementary material for: RNA-Seq of the Caribbean reef-building coral Orbicella faveolata (Scleractinia-Merulinidae) under bleaching and disease stress expands models of coral innate immunity
Source: PeerJ. 2016 Feb 15;4:e1616. doi: 10.7717/peerj.1616 (PMC4768675; doi:10.7717/peerj.1616)
Supplement: Supplemental Information 1 [file peerj-04-1616-s001.xlsx]

## Sheet: Sheet1
Sample	TissueSample Condition	Colony Condition	Colony	Accession
1	Bleached	Partial Bleaching	1	SRX445739
2	Asymptomatic	Partial Bleaching	1	SRX445743
3	Asymptomatic	CYB Diseased	2	SRX445746
4	CYBD Lesion	CYB Diseased	2	SRX445745
5	CYBD Lesion	CYB Diseased	3	SRX445742
6	Asymptomatic	Asymptomatic	4	SRX445744
