# Supplementary material for: RNA-Seq of the Caribbean reef-building coral Orbicella faveolata (Scleractinia-Merulinidae) under bleaching and disease stress expands models of coral innate immunity
Source: PeerJ. 2016 Feb 15;4:e1616. doi: 10.7717/peerj.1616 (PMC4768675; doi:10.7717/peerj.1616)
Supplement: Supplemental Information 3 [file peerj-04-1616-s003.xlsx]

## Sheet: Sources
	Species	Publication	Source	Derived from	# sequences	max bp	min bp	Date Downloaded for ID of Ofav transcripts in metatranscriptome	Date Downloaded for KEGG KAAS Comparative Annotation
	Nematostella vectensis	Putnam et al. 2007	NCBI Refseq mRNA	Whole Genome Shotgun	24881	26238	150	2013-12-12	2015-08-01
	Hydra magnipapillata	Chapman et al. 2010	NCBI Refseq mRNA	Whole Genome Shotgun	77548	24396	36	2013-12-12	NA
	Hydra vulgaris	Hemmrich et al. 2012	NCBI Refseq mRNA	454 FLX	22036	24396	153	2013-12-12	2015-08-01
	Porites astreoides	Kenkel et al. 2013	http://www.bio.utexas.edu/research/matz_lab/matzlab/Data.html	454 Titanium	30740	8171	100	NA	2015-08-01
	Acropora millepora	Moya et al. 2012	http://www.bio.utexas.edu/research/matz_lab/matzlab/Data.html	454 FLX and Titanium	52958	34139	226	NA	2015-08-01
	Acropora digitifera	Shinzato et al. 2011	http://marinegenomics.oist.jp/genomes/downloads?project_id=3	454 FLX, Illuma GAIIx	36780	19622	101	2013-12-12	2015-08-01
	Pocillopora damicornis	Traylor-Knowles et al. 2011	http://cnidarians.bu.edu/PdamBase/cgi-bin/index.cgi	454 FLX	70786	10512	40	NA	2015-08-01
	Orbicella faveolata	Various (Supp Info.	NCBI EST	cDNA, Sanger	29334	851	100	NA	2015-08-01
	Orbicella faveolata	Pinzon et al. 2015	http://datadryad.org/resource/doi:10.5061/dryad.fj276/3	Illumin TruSeq	178943	38110	201	NA	2015-08-01
	Symbiodinium spp. (KB8 and Mf105b)	Bayer et al. 2012	http://medinalab.org/zoox/	454 FLX and Titanium	148796	15623	40	2013-12-12	NA
	Symbiodinium minutum	Shoguchi et al. 2013	http://marinegenomics.oist.jp/genomes/downloads?project_id=21	Illumina GAIIx	64924	28591	100	2013-12-12	NA
